## LABORATORY INVESTIGATIONS

Anesthesiology  
83:309-315, 1995  
© 1995 American Society of Anesthesiologists, Inc.  
Lippincott-Raven Publishers

# ***d*-Tubocurarine Accentuates the Burn-induced Upregulation of Nicotinic Acetylcholine Receptors at the Muscle Membrane**

C. Kim, Ph.D.,\* M. Hirose, M.D., Ph.D.,† J. A. J. Martyn, M.D.‡

**Background:** Increases in acetylcholine receptors (AChRs) at the muscle membrane, induced by burn injury, have been associated with a hyperkalemic response to succinylcholine and resistance to d-tubocurarine-like drugs. Muscle relaxants often are administered to burn-injured patients in the intensive care unit to facilitate mechanical ventilation. This study in rats tested whether continuous administration of d-tubocurarine in subparalytic doses exaggerates the upregulation of AChRs induced by burn trauma. Subparalytic doses were used to avoid the confounding effects of immobilization.

**Methods:** Three days after an approximate 50% body surface area burn or sham injury, the animals received an infusion of  $3.03 \pm 0.05 \mu\text{g/h}$  of d-tubocurarine or equal volume of saline directly to the left gastrocnemius muscle *via* a catheter connected to a subcutaneously implanted osmotic pump. After 7 days of d-tubocurarine or saline infusion, the AChRs were quantitated using  $^{125}\text{I}$ - $\alpha$ -bungarotoxin. The AChRs on the d-tubocurarine or saline-infused left gastrocnemius were compared to the contralateral gastrocnemius in the same group. The right or left gastrocnemius AChRs were compared to the ipsilateral muscles between groups. These intra- and inter-

group comparisons allowed the delineation of the effects of catheter irritation, burns, or d-tubocurarine on AChRs.

**Results:** Daily examination of the withdrawal response to toe-pinch revealed no evidence of paralysis. Weight loss in the burn-injury animals receiving d-tubocurarine or saline was similar, confirming that the infusion of d-tubocurarine did not impair the mobility of the animals to move and feed. The plasma d-tubocurarine concentration after 7 days of infusion was  $26.0 \pm 12 \text{ ng/ml}$  (mean  $\pm$  SE). Regardless of burn or sham injury or of d-tubocurarine or saline infusion, the concentration of AChRs on the left was consistently greater than in the contralateral right gastrocnemius muscles within the same group, indicating that manipulation of the area alone can result in upregulation of AChRs. The AChRs in the right gastrocnemius of burn-injured animals were greater than those in the same muscle of sham-injured animals, regardless of saline ( $7.24 \pm 0.9$  vs.  $5.7 \pm 0.5$  fmoles/mg protein,  $P = 0.06$ ) or d-tubocurarine ( $7.3 \pm 0.4$  vs.  $5.7 \pm 0.5$ ,  $P < 0.05$ ) infusion to the burn-injury groups. AChRs in the left gastrocnemius of burn-injury animals receiving d-tubocurarine were significantly greater than those in burn- or sham-injury animals receiving saline ( $13.9 \pm 1.1$  vs.  $9.8 \pm 1.2$  and  $7.1 \pm 0.5$  fmoles/mg protein, respectively,  $P < 0.05$ ).

**Conclusions:** Burn-induced upregulation of AChRs is accentuated by infusion of subparalytic doses of d-tubocurarine. Concomitant administration of d-tubocurarine to burn-injured patients may result in further exaggeration of the aberrant responses to neuromuscular relaxants. (Key words: Burns; drug interaction. Neuromuscular relaxants: d-tubocurarine. Receptors: acetylcholine; nicotinic.)

This article is accompanied by an editorial. Please see Lee C: Intensive care unit neuromuscular syndrome? ANESTHESIOLOGY 83:237-240, 1995.

\* Instructor in Anaesthesia, Harvard Medical School; Research Associate, Massachusetts General Hospital and Shriners Burns Institute.

† Research Fellow in Anesthesia, Massachusetts General Hospital and Shriners Burns Institute.

‡ Professor of Anaesthesia, Harvard Medical School; Anesthetist, Massachusetts General Hospital; Associate Director of Anesthesia, Shriners Burns Institute.

Received from the Department of Anaesthesiology, Harvard Medical School; Anesthesia Services of Massachusetts General Hospital; and Shriners Burns Institute, Boston Massachusetts. Submitted for publication August 23, 1993. Accepted for publication March 28, 1995. Supported in part by grants to Dr. Martyn from the National Institutes of Health (R01 GM31569-12) and Shriners Burns Institute.

Address for correspondence Dr. Martyn: Director, Clinical and Biochemical Pharmacology Laboratory, Department of Anesthesia, Massachusetts General Hospital, Boston, Massachusetts 02114.

been shown to increase AChR numbers, simulating a denervation-like state, despite anatomic continuity between nerve and muscle.<sup>3-5</sup> Whether the AChR proliferation was due to the drug or to immobilization could not be concluded, because the doses used also caused paralysis and/or immobilization of the muscle.<sup>3-5</sup> Partial or complete immobilization of muscle, in the absence of denervation or competitive antagonists, can upregulate AChRs.<sup>6-8</sup>

Burn injury to skin has been shown to cause an upregulation of AChRs locally and at sites distant from the burn,<sup>9-13</sup> although some controversy exists about this.<sup>14</sup> An increase of AChRs, regardless of etiology, usually is associated with resistance to competitive antagonists, such as d-tubocurarine, metocurine, and atracurium,<sup>9,15-17</sup> and increased sensitivity to depolarizing relaxants, such as succinylcholine.<sup>18,19</sup> A previous study from our laboratory indicated that subparalytic (subtherapeutic) doses of competitive antagonist d-tubocurarine can upregulate AChRs.<sup>19</sup> Patients with major thermal injury often receive nondepolarizing neuromuscular relaxants for prolonged periods to facilitate mechanical ventilation in the intensive care unit. The current study in rats examines whether the administration of a competitive antagonist in subparalytic doses accentuates the upregulation of AChRs induced by burn trauma; the confounding effects of immobilization thus were eliminated.

## Materials and Methods

### Burn Injury

All experiments followed and conformed to the animal care guidelines of the Massachusetts General Hospital and Shriners Burns Institute and were reviewed by the Institutional Animal Studies Review Board. These experiments also conformed to the rules and regulations of the National Institutes of Health, which supported these studies. Male Sprague-Dawley rats (Taconic Farms, Germantown, NY; 225-300 g) underwent splenectomy under aseptic conditions during pentobarbital (Abbott, Chicago, IL) anesthesia administered as 50 mg/kg intraperitoneally. Adequacy of anesthesia was tested by the withdrawal response to toe-clamping. Splenectomy, which prevents autotransfusion of blood from spleen, was performed to enhance the shock state of burn injury. Seven days after splenectomy, the animals were reanesthetized with pentobarbital, and a full-thickness third-degree burn injury to the skin was given,

as previously described.<sup>9,20</sup> Briefly, the fur on the trunk was shaved and approximately 50% of total body surface area was injured by immersion in water at 75-85°C. The back and flanks were exposed to the hot water for 10 s each, and the abdomen for 6 s. Control animals were treated the same way as the trauma group but were immersed in lukewarm water. All animals received the same postoperative care. During recovery from anesthesia, all animals were warmed by a heat lamp to maintain body temperature (about 37°C) and were resuscitated with a crystalloid solution 4 ml/kg/% burn, administered intraperitoneally. After recovery from anesthesia, the animals were allowed crystalloid solution, *ad lib*, orally. A 1% silver sulfadiazine cream (Silvadine, Marion Labs, Kansas City, MO) was applied to the injured areas. The size of the burn was evaluated on the day of injury (day 1) and at 3 and 10 days after injury. The size of the burn was measured and expressed as a percentage of the total body surface, which was calculated by using the equation  $0.0011 \times (\text{body weight})^{0.67, 21}$

**Local Administration of d-Tubocurarine or Saline to Left Gastrocnemius.** The classic pharmacologic probe of the neuromuscular junction, d-tubocurarine, was used as the test drug. Three days after burn or sham injury, the animals were reanesthetized with incremental doses of intraperitoneal pentobarbital sodium and infusion of d-tubocurarine or saline, initiated *via* Alzet osmotic pumps (Alza, Palo Alto, CA). These pumps were implanted subcutaneously on the backs of the animals, slightly posterior to the scapulae. The flow moderator of the pump was connected to PE60 tubing (Becton Dickinson, Parsippany, NJ) and filled with the same solution as that in the pump (d-tubocurarine or saline). The free end of the tubing was threaded subcutaneously from the back to the left leg and placed in close proximity to the insertion of the inner semitendinosus muscle in the popliteal fossa at the upper leg, close to the sciatic nerve. The left gastrocnemius muscle was not touched by the implanted catheter but was exposed to the infused solution. All animals received identical postoperative care. The sham-injury group received saline only. The burn-injury group was subdivided into two groups; one group received saline, and the other received d-tubocurarine. The number of animals in each group is indicated in tables 1 and 2. Because of the potential for a higher mortality in the burn-injury group that received d-tubocurarine, a higher number of animals were studied. The osmotic pump (model 2001) filled with d-tu-

## d-TUBOCURARINE ACCENTUATION

Table 1. Changes in Body Weight and Size of Burn

| Body weight (g)    | Size of burn (% of body surface area) |
|--------------------|---------------------------------------|
| Day of burn        | Day of burn                           |
| 3 days after burn  | 3 days after burn                     |
| 10 days after burn | 10 days after burn                    |

\*P < 0.001 versus preburn weight in the same animal.  
†P < 0.001 versus the weight of time-matched control.  
‡P < 0.001 versus the size on day of burn.

curarine 2.7 mg/ml (Bristol-Myers Squibb, NJ) or an equal volume of saline fluids at a rate of  $1.12 \pm 0.02$  µl/hr. d-Tubocurarine was administered to the left gastrocnemius muscle in subparalytic doses; the confounding effects of immobilization thus were eliminated. The animals that received d-tubocurarine were compared with the animals that received saline in previous studies<sup>19</sup> documented that d-tubocurarine to normal animals did not alter AChRs. Furthermore, the intergroup comparisons in this study allowed the effects of catheter irritation on upregulation of AChRs. All animals were checked daily for the presence or absence of withdrawal pinch. Seven days after initiation of saline infusion (10 days after burn), the animals were killed by an overdose of pentobarbital. The left gastrocnemius muscle and the contralateral right gastrocnemius muscle were removed and frozen for AChR number determination.

Table 2. AChR Number in the Gastrocnemius Muscle

| Left gastrocnemius | Right gastrocnemius |
|--------------------|---------------------|
| Sham-injury group  | Sham-injury group   |
| Burn-injury group  | Burn-injury group   |

\*P < 0.05 left versus right gastrocnemius within group.  
†P = 0.05 versus ipsilateral muscle in sham-injury group.  
‡P < 0.05 versus ipsilateral muscle of sham-injury group.  
§P < 0.05 versus ipsilateral muscle in sham-injury group.

# d-TUBOCURARINE ACCENTUATES UPREGULATION OF AChRs OF BURNS

**Table 1. Changes in Body Weight and Size of Burn with Time**

|                                       | Sham-Burns with Saline Infusion<br>(n = 10) | Burns with Saline Infusion<br>(n = 9) | Burns with d-Tubocurarine<br>Infusion (n = 15) |
|---------------------------------------|---------------------------------------------|---------------------------------------|------------------------------------------------|
| Body weight (g)                       |                                             |                                       |                                                |
| Day of burn                           |                                             |                                       |                                                |
| 3 days after burn                     | 266 ± 5                                     | 270 ± 5                               | 259 ± 6                                        |
| 10 days after burn                    | 272 ± 6*                                    | 247 ± 6*†                             | 238 ± 5*†                                      |
| Size of burn (% of body surface area) | 308 ± 7*                                    | 252 ± 11*†                            | 246 ± 5*†                                      |
| Day of burn                           | —                                           |                                       |                                                |
| 3 days after burn                     | —                                           | 48 ± 1                                | 47 ± 1                                         |
| 10 days after burn                    | —                                           | 43 ± 1‡                               | 43 ± 1‡                                        |
|                                       |                                             | 37 ± 1‡                               | 35 ± 2‡                                        |

\*  $P < 0.001$  versus preburn weight in the same group.

†  $P < 0.001$  versus the weight of time-matched sham-burned group.

‡  $P < 0.001$  versus the size on day of burn.

curarine 2.7 mg/ml (Bristol-Myers Squibb, Princeton, NJ) or an equal volume of saline delivered each of the fluids at a rate of  $1.12 \pm 0.02 \mu\text{l/h}$  for 1 week. d-Tubocurarine was administered to burn-injury rats in subparalytic doses; the confounding sequelae of immobilization thus were eliminated. A sham-injury group that received d-tubocurarine was not studied, because previous studies<sup>19</sup> documented that subparalytic doses of d-tubocurarine to normal animals can upregulate AChRs. Furthermore, the intergroup (ipsilateral muscles between) and intragroup (right *vs.* left within) comparisons in this study allowed the delineation of the effects of catheter irritation *versus* burns *versus* d-tubocurarine on upregulation of AChRs.

All animals were checked daily for paralysis of the right and left gastrocnemius muscle by assessing the presence or absence of withdrawal reflex during toe-pinch. Seven days after initiation of d-tubocurarine or saline infusion (10 days after burn or sham injury), the animals were killed by an overdose of pentobarbital. The left gastrocnemius receiving the infusion and the contralateral right gastrocnemius muscles were ex-

cised, washed several times in saline, chopped quickly, and frozen in liquid nitrogen. The frozen samples were kept at  $-70^\circ\text{C}$  until quantitation of AChR number.

**Acetylcholine Receptor Assay.** The AChR numbers were quantitated by  $^{125}\text{I}$ - $\alpha$ -bungarotoxin ( $^{125}\text{I}$ - $\alpha$ -BTX) (specific activity  $16.8 \mu\text{Ci}/\mu\text{g}$ , New England Nuclear, Boston, MA), which binds specifically and irreversibly to the AChRs. The assay procedure was reported previously.<sup>10,11</sup> On the day of the assay, the muscles were thawed and homogenized for 1 min in four volumes of 0.01 M potassium phosphate buffer, pH 7.4, containing 1 mM EDTA, 2 mM benzamidine hydrochloride, 0.1 mM phenylmethylsulfonyl fluoride, 0.5 mg/ml bacitracin, and 0.02% (w/v) sodium azide at  $4^\circ\text{C}$ . The homogenate was centrifuged at 20,000 g for 30 min at  $4^\circ\text{C}$ . The precipitants were resuspended and homogenized for 1 min in the same buffer containing an additional 2% (v/v) Triton X-100 (Sigma, St Louis, MO), a detergent that extracts the AChRs. The extraction procedure was continued overnight, on a shaker, in a cold room. The solution was centrifuged at 20,000 g for 50 min at  $4^\circ\text{C}$ ; the supernatant was recovered

**Table 2. AChR Number in the Gastrocnemius Muscles (fmol/mg protein)**

|                     | Sham-Burns with Saline Infusion<br>(n = 10) | Burns with Saline Infusion<br>(n = 9) | Burns with d-Tubocurarine<br>Infusion (n = 15) |
|---------------------|---------------------------------------------|---------------------------------------|------------------------------------------------|
| Left gastrocnemius  | 7.13 ± 0.47*                                | 9.84 ± 1.21*                          | 13.93 ± 1.07*‡                                 |
| Right gastrocnemius | 5.72 ± 0.47                                 | 7.18 ± 0.88†                          | 7.33 ± 0.43§                                   |

\*  $P < 0.05$  left *versus* right gastrocnemius within each group.

†  $P = 0.06$  *versus* ipsilateral muscle in sham-burned controls.

‡  $P < 0.05$  *versus* ipsilateral muscle of sham or burned-group receiving saline.

§  $P < 0.05$  *versus* ipsilateral muscle in sham-burned controls.

and stored at  $-70^{\circ}\text{C}$ . Triplicate samples of crude muscle extract were incubated with  $2.5\text{ nM }^{125}\text{I}\alpha\text{-BTX}$  in the 2% Triton buffer for 90 min at room temperature. Excess  $^{125}\text{I}\alpha\text{-BTX}$  was separated from toxin-bound AChR complex using polyethylenimine, pretreated Whatman GF/B glass fiber filters by vacuum filtration. Nonspecific binding of  $^{125}\text{I}\alpha\text{-BTX}$  was detected by preincubation, with excess unlabeled  $1\text{ }\mu\text{M}$  of  $\alpha\text{-BTX}$ . The protein concentration of muscle extract was assayed according to the Hartree method.<sup>22</sup> The number of AChRs was expressed as fmoles/mg protein.

**Analysis of Plasma d-Tubocurarine Concentrations.** At the time of killing, blood was extracted into heparinized syringes by cardiac puncture. The plasma was separated and stored at  $-70^{\circ}\text{C}$  until the assay. Plasma d-tubocurarine concentrations were analyzed by reversed-phase HPLC method, as described previously.<sup>23</sup> The lower detection limit of the assay was 10 ng/ml of d-tubocurarine in plasma.

**Statistical Analysis.** One-way analysis of variance for repeat measurements and Dunnett's multiple comparison tests were used to identify the significant differences between groups. The paired *t* test was used to compare differences within the groups (e.g., AChR changes between right and left gastrocnemius within the same group). A significant difference was assumed if the *P* value was  $<0.05$ . Values were expressed as mean  $\pm$  SEM.

## Results

### Body Weight, Size of Burn Injury, and Mobility

There were no differences in body weights between groups before thermal or sham injury (table 1). No apparent differences in movement or eating behavior were observed after implantation of the pumps. The withdrawal response to pinch, tested daily, was present in all animals. After thermal injury, the sham-injury control group gained weight significantly. The body weights of the experimental groups, however, decreased at 3 days after burn compared to its preburn weight and remained at that weight even at 10 days after burn (table 1). The percentage of body surface area burns did not differ between the burn groups either on the day of the injury or at 3 and 10 days after burn, but there was a decrease in burn size with time (table 1).

### Plasma d-Tubocurarine Concentration

The plasma concentration of d-tubocurarine in the burn-injury group receiving the drug was  $26.0 \pm 12.2$

ng/ml after 7 days of infusion to the left gastrocnemius. In two animals of the burn-injury group receiving d-tubocurarine, the concentration of d-tubocurarine was less than the detection limits (10 ng/ml) of the assay, and these data were not included.

### AChR Numbers

Changes in AChR numbers are indicated in table 2. Nonspecific binding of  $^{125}\text{I}\alpha\text{-BTX}$  was  $21.63 \pm 0.95\%$ . The left gastrocnemius muscle of all three groups consistently showed significantly greater concentration of AChRs than their contralateral right muscles. The concentrations of AChRs in the right gastrocnemius of the burn-injury group that received saline were increased ( $P = 0.06$ ), compared to the right gastrocnemius in sham-injury animals. The AChR concentrations in the left gastrocnemius of burn-injury animals receiving d-tubocurarine were significantly greater than those in the left gastrocnemius of burn- or sham-injury animals receiving saline. In the burn-injury group that received d-tubocurarine, the right gastrocnemius was exposed to d-tubocurarine because of systemic absorption ( $26.0 \pm 12.2\text{ ng/ml}$ ). The AChR concentration in these muscles was greater than that in the same muscle of sham-injury controls but did not differ from the burn-injury group receiving saline.

## Discussion

The inter- and intragroup comparisons in the three groups have allowed us to distinguish the effects of catheter *versus* burn *versus* d-tubocurarine infusion on AChRs. Regardless of burn or sham injury or d-tubocurarine or saline infusion, the AChRs in the left side were always greater than in the contralateral right within the same group. Actual contact with the left gastrocnemius muscles by the infusion catheter was avoided. Therefore, it seems that surgical manipulation of the left side by the implantation of the catheter and the subsequent inflammation will upregulate AChRs. This observation in our study complements the observation by others that degeneration or inflammation of muscle, even the presence of a thread on the surface of an innervated muscle, increases the sensitivity to agonist drugs.<sup>24,25</sup> The increased sensitivity to agonists is indirect pharmacologic evidence of increased AChRs.<sup>2</sup> The observations of Pavlin *et al.*,<sup>13</sup> whereby AChRs increase after even a 2% burn injury over the gastrocnemius muscle, confirm the role of injury and/or inflammation.

The concentration of AChRs in the muscle of burn-injury animals, infused with saline, were greater than the ipsilateral muscle of sham-injury animals. The analysis of the data indicated that, in the burn-injury group receiving d-tubocurarine, statistical significance of the increase in AChR concentration was achieved, provided the values were compared to the same muscle of burn-injury animals receiving saline. AChR concentrations in the muscle of burn-injury animals receiving d-tubocurarine (to the left gastrocnemius) were significantly greater than in sham-injury animals. The increase in AChR concentration in the right gastrocnemius muscles in our study was not statistically significant, but it confirms previous observations that the area of burn causes the proliferation of AChRs. Our findings contrast with the report of Burns *et al.*,<sup>26</sup> who did not find changes in AChR at sites immediately beneath the area of burn. As stated previously, however, we documented increases in AChRs at sites immediately beneath the area of burn.

The mature AChR is a pentamer composed of  $\alpha$ ,  $\beta$ ,  $\gamma$ , and  $\delta$  subunits. Immature AChRs, mutually exclusive of the mature AChRs, are present and add to the total AChR pool. With motor nerve denervation, the messenger ribonucleic acid levels, including that of  $\gamma$  subunits, in AChRs after burn injury probably increased for only one AChR subunit, the  $\gamma$  subunit, because of the presence of detectable levels of  $\gamma$  subunits. The immature form of AChR, expressed after burn injury and the AChR protein is not related to denervation-like phenomenon.<sup>27</sup> The increase in myogenic regulatory protein, myogenin,<sup>27</sup> which also increases muscle activity.<sup>28,29</sup> The increased surface expression of AChRs has been observed in muscle.<sup>30,31</sup> Burn injury is associated with increased levels of cyclic adenosine monophosphate, the magnitude of which is related to the severity of burn injury.<sup>32,33</sup> For these reasons, we speculate that the increased AChR concentration is related not to a transcription

# d-TUBOCURARINE ACCENTUATES UPREGULATION OF AChRs OF BURNS

The concentration of AChRs in right gastrocnemius muscle of burn-injury animals, which received an infusion of saline, were greater ( $P = 0.06$ ) than that of ipsilateral muscle of sham-injury controls. Power analysis of the data indicated that, if the number of animals in the burn-injury group receiving saline was increased to 20, statistical significance of  $P < 0.05$  would have been achieved, provided the variability remained the same. AChR concentrations in right gastrocnemius muscle of burn-injury animals receiving infusion of d-tubocurarine (to the left gastrocnemius) were significantly greater than in sham-injury animals. The gastrocnemius muscles in our study were not directly beneath the area of burn injury. Thus, the current study confirms previous observations<sup>9-12</sup> that burn injury causes the proliferation of AChRs at sites distant from the area of burn. Our findings of increased AChRs after burns contrast with the report of Pavlin *et al.*, who did not find changes in AChRs at sites distant from burn.<sup>14</sup> As stated previously, however, their studies documented increases in AChRs at muscle membrane immediately beneath the area of a small burn.<sup>13</sup>

The mature AChR is a pentameric protein with a subunit composition of  $\alpha$ ,  $\beta$ ,  $\epsilon$ , and  $\delta$ ; the immature AChR is composed of  $\alpha$ ,  $\beta$ ,  $\gamma$ , and  $\delta$ . Thus, in the mature and immature AChRs, mutually exclusive  $\epsilon$  and  $\gamma$  subunits, respectively, are present in addition to other subunits. With motor nerve denervation, the transcripts (messenger ribonucleic acid levels, mRNAs) of all subunits, including that of  $\gamma$  subunits, increase.<sup>26</sup> The increased AChRs after burn injury probably are not a gene-mediated phenomenon, because the transcripts were increased for only one AChR subunit protein.<sup>27</sup> The absence of detectable levels of  $\gamma$ -subunit mRNAs suggests that the immature form of AChRs probably are not expressed after burn injury and that the upregulation of AChR protein is not related to a nerve-related or denervation-like phenomenon.<sup>27</sup> The absence of a denervation-like state after burns is confirmed by the lack of increases in myogenic regulatory proteins, myo-D and myogenin,<sup>27</sup> which also increase with denervation and decreased muscle activity.<sup>28,29</sup> Increased assembly and surface expression of AChRs has been shown with increased levels of cyclic adenosine monophosphate in muscle.<sup>30,31</sup> Burn injury is associated with increased cyclic adenosine monophosphate levels in muscle, the magnitude of which is related to size and location of burn injury.<sup>32,33</sup> For these reasons, it is tempting to speculate that the increased AChRs after burns probably are related not to a transcriptional phenomenon but to

a post-transcriptional mechanism, such as increased assembly and/or cell surface expression of the receptor.

Previous studies by Berg *et al.*<sup>3</sup> and Chang *et al.*<sup>4</sup> documented *in vivo* that AChR inhibition by ligands, including muscle relaxants, upregulates AChRs. The doses in these studies, however, caused partial or complete immobilization (paralysis) of muscle. Immobilization alone can induce a proliferation of AChRs in the absence of denervation or inhibition of AChR.<sup>6-8</sup> The studies of Dodson *et al.*, in which critically ill, intensive-care patients received vecuronium, confirm the upregulation of AChRs by immobilization and/or receptor antagonism.<sup>5</sup> In all of these studies, the confounding effects of immobilization *versus* drug-induced upregulation of AChRs were not differentiated. We previously confirmed, however, that chronic competitive inhibition of AChRs by d-tubocurarine can upregulate the receptor in unburned rats, even in the absence of paralysis.<sup>19</sup>

In the current study, the d-tubocurarine directly infused to the fossa behind the knee did not cause muscular paralysis of the gastrocnemius muscle. This was tested by daily examination of the mobility of the animals. The absence of paralysis or immobilization was confirmed by daily examination of the withdrawal response to toe-pinch, which was present on both sides in the animals receiving d-tubocurarine. That the weight of the burn-injury animals receiving d-tubocurarine did not differ from the weight of the burn-injury animals receiving saline indicates that the infusion of d-tubocurarine duly impaired the mobility of the animals to feed. The high margin of safety in neuromuscular transmission<sup>34</sup> allowed us to infuse d-tubocurarine with no apparent paralysis. More sensitive measures, such as the response to train-of-four or 50-Hz tetanus,<sup>35</sup> however, may have documented the presence of subclinical paralysis.

The most salient observation in the current study is that concomitant administration of d-tubocurarine to burn-injured animals accentuates the upregulation of AChRs induced by burn injury. The AChRs in the left gastrocnemius of burn-injury animals receiving the direct infusion of d-tubocurarine were higher than those in the same muscles of the other two groups (table 2). The AChRs in the right gastrocnemius of burn-injury animals receiving d-tubocurarine also were significantly greater than that in the ipsilateral side of unburned controls but not higher than in burn-injury animals receiving saline. The fact that the right gastrocnemius AChRs in burn-injury animals receiving d-tubocurarine

was not higher than that in the same muscle of burn-injury animals receiving saline suggests that the increase of AChRs in the former probably was related to burn and not to the small concentrations of d-tubocurarine. Although the right side was exposed to d-tubocurarine, because of systemic absorption of locally infused d-tubocurarine, the absence of further increases in AChRs, as compared to the right gastrocnemius muscle of the burn-injury animals receiving saline, may be due to inadequate d-tubocurarine levels or insufficient length of exposure. In the previous study, in which upregulation was observed with d-tubocurarine in normal, mobile animals, the mean plasma d-tubocurarine level was 0.4  $\mu\text{g/ml}$  at the end of 2 weeks (*vs.* 0.26  $\text{ng/ml}$  after 1 week in this study).<sup>19</sup> Systemic or local infusions of higher doses were not attempted because of the potential for generalized and localized paralysis.

Upregulation of a receptor with small doses of an antagonist is known and has been used to advantage. For example, in congestive heart failure,<sup>36,37</sup>  $\beta$ -adrenoceptors usually are downregulated, and their antagonists are relatively contraindicated because of the dependence of the heart on the remaining adrenoceptors for its inotropy. Despite this contraindication, the use of small doses (indicated by absence of hemodynamic changes) of antagonists upregulated  $\beta$ -adrenoceptors and improved myocardial performance.<sup>36,37</sup> That is, it is not essential to antagonize a receptor to measurable effects (*e.g.*, paralysis) to induce an upregulation. Such a mechanism may have been operative in our studies. Measurement of mRNA levels of AChR subunits and of myoD and myogenin would indicate whether this upregulation by d-tubocurarine is transcriptionally mediated and whether it is related to a denervation-like phenomenon.<sup>27-29</sup> Whether the concomitant administration of muscle relaxants can induce the expression of  $\gamma$ -type or immature AChR protein, similar to that seen after denervation, is important to know and may be relevant to the recent reports of prolonged muscle weakness after chronic use of muscle relaxants.<sup>38,39</sup>

In summary, the important findings in the study are that local irritation and, possibly, the related inflammation can upregulate AChRs and that d-tubocurarine can accentuate the burn-induced upregulation of AChRs, even in the absence of immobilization. Burn injury results in aberrant pharmacologic responses, including a lethal hyperkalemic response to succinylcholine and resistance to nondepolarizing relaxants, both of which are related to quantitative changes in AChRs.<sup>2,18</sup> Neuromuscular relaxants are administered

to critically ill burn-injury patients to facilitate mechanical ventilation, decrease oxygen consumption, improve oxygenation, and decrease shivering.<sup>40</sup> Based on the current study, it seems that the administration of even small doses of d-tubocurarine will further upregulate AChRs over and above that seen after burn injury alone. These drug-induced changes of AChRs may result in further exaggeration of the aberrant pharmacologic responses of burn injury.

The authors thank Chhaya Mani, for secretarial and editorial assistance.

## References

1. Martyn JAJ, White DA, Gronert GA, Jaffe RS, Ward JM: Up-and-down regulation of skeletal muscle acetylcholine receptors: Effects on neuromuscular relaxants. *ANESTHESIOLOGY* 76:822-843, 1992
2. Wonnacott S: The paradox of nicotinic acetylcholine receptor upregulation by nicotine. *Trends Pharmacol Sci* 11:216-219, 1990
3. Berg DK, Hall ZW: Increased extrajunctional acetylcholine sensitivity produced by chronic post-synaptic neuromuscular blockade. *J Physiol (Lond)* 244:659-676, 1975
4. Chang CC, Chuang S, Huang MC: Effects of chronic treatment with various neuromuscular blocking agents on the number and distribution of acetylcholine receptors in the rat diaphragm. *J Physiol (Lond)* 250:161-173, 1975
5. Dodson BA, Kelly BJ, Bruswell LM, Cohen NH: Long-term, high dose muscle relaxation causes up-regulation of acetylcholine receptors in critically ill adults (abstract). *ANESTHESIOLOGY* 79:A292, 1993
6. Fischbach GD, Robbins N: Effect of chronic disuse of rat soleus neuromuscular junctions on postsynaptic membrane. *J Neurophysiol* 34:562-569, 1971
7. Pestronk A, Drachman DB, Griffin JW: Effect of muscle disuse on acetylcholine receptors. *Nature* 260:352-353, 1976
8. Yanez P, Itani MS, Martyn JAJ: D-tubocurarine infusion with and without immobilization causes hyperkalemia to succinylcholine (abstract). *J Clin Pharmacol* 33:1007, 1993
9. Kim C, Fuke N, Martyn JAJ: Burn injury to trunk of rat causes denervation-like responses in the gastrocnemius muscle. *J Appl Physiol* 65:1655-1661, 1988
10. Kim C, Fuke N, Martyn JAJ: Thermal injury to rat increases nicotinic acetylcholine receptors in the diaphragm. *ANESTHESIOLOGY* 68:401-406, 1988
11. Ward JM, Martyn JAJ: Burn injury induced acetylcholine receptor changes on muscle membrane. *Muscle Nerve* 16:348-354, 1993
12. Perov S, Prasad JK, Nagelhout J, Walczyk W, Martyn JAJ: Up-regulation of acetylcholine receptors in a severely burned patient (abstract). *ANESTHESIOLOGY* 81:A1089, 1994
13. Pavlin EG, Howard MC, Slattery JT: Large burns magnify and prolong increases in acetylcholine receptors and resistance to muscle relaxants in muscles under burned skin in rats (abstract). *ANESTHESIOLOGY* 81:A1106, 1994
14. Pavlin EG, Haschke RH, Marathe P, Slattery JT, Howard ML, Butler SH: Resistance to atracurium in thermally injured rats. *ANESTHESIOLOGY* 69:695-701, 1988
15. Kim CS, Arnold EJ, Itani MS, Martyn JAJ: Burn injury increases d-tubocurarine binding to protein binding and acetylcholine receptors. *ANESTHESIOLOGY* 77:500-506, 1992
16. Brett RS, Schmidt JH, Gage JS, Slattery JT: Measurement of acetylcholine receptor concentration in a patient with multiple sclerosis. *ANESTHESIOLOGY* 66:837-839, 1987
17. Hogue CW, Itani MS, Martyn JAJ: Burn injury increases acetylcholine receptors at the neuromuscular junction. *ANESTHESIOLOGY* 79:109, 1990
18. Gronert GA, Theye RA: Pathophysiology of succinylcholine. *ANESTHESIOLOGY* 77:109, 1990
19. Hogue CW, Ward JM, Itani MS, Martyn JAJ: Regulation of acetylcholine receptors by d-tubocurarine. *J Appl Physiol* 72:326-332, 1992
20. Yurt RW, Pruitt BA: Baseline and burn-induced changes in histamine in rats. *J Appl Physiol* 60:17, 1986
21. Altman PL, Dittmer DS: *Biological Assays*. Bethesda: Federation of American Societies for Experimental Biology, 1968, p 347
22. Hartree EF: Determination of protein by a modified Lowry method that gives a linear photometric response. *Anal Biochem* 48:422-427, 1972
23. Annan SR, Kim C, Martyn JAJ: Measurement of succinylcholine in human urine using solid-phase high performance liquid chromatography. *J Chromatogr* 526:228-234, 1990
24. Jones R, Vrbova G: Two factors in the development of denervation hypersensitivity. *Neurosci Lett* 53:8, 1974
25. Katz B, Miledi R: The development of denervation hypersensitivity in nerve-free segments of skeletal muscle. *Neurosci Lett* 39:6, 1984
26. Witzemann V, Brenner HR, Sakmann B: AChR subunit mRNAs at rat neuromuscular junctions. *Neurosci Lett* 125-141, 1991
27. Ward JM, Rosen KM, Martyn JAJ: Acetylcholine receptor mRNA changes in burns are different from those in denervation. *J Burn Care Rehab* 14:595-601, 1993

# d-TUBOCURARINE ACCENTUATES UPREGULATION OF AChRs OF BURNS

15. Kim CS, Arnold FJ, Itani MS, Martyn JAJ: Decreased sensitivity to metocurine during long-term phenytoin therapy may be attributable to protein binding and acetylcholine receptor changes. *ANESTHESIOLOGY* 77:500-506, 1992
16. Brett RS, Schmidt JH, Gage JS, Schartel SA, Poppers PJ: Measurement of acetylcholine receptor concentration in skeletal muscle from a patient with multiple sclerosis and resistance to atracurium. *ANESTHESIOLOGY* 66:837-839, 1987
17. Hogue CW, Itani MS, Martyn JAJ: Resistance to d-tubocurarine in lower motor neuron injury is related to increased acetylcholine receptors at the neuromuscular junction. *ANESTHESIOLOGY* 73:703-709, 1990
18. Gronert GA, Theye RA: Pathophysiology of hyperkalemia induced by succinylcholine. *ANESTHESIOLOGY* 43:89-99, 1975
19. Hogue CW, Ward JM, Itani MS, Martyn JAJ: Tolerance and up-regulation of acetylcholine receptors follow chronic infusion of d-tubocurarine. *J Appl Physiol* 72:1326-1331, 1992
20. Yurt RW, Pruitt BA: Baseline and post thermal injury plasma histamine in rats. *J Appl Physiol* 60:1782-1788, 1986
21. Altman PL, Dittmer DS: Biological Handbooks: Metabolism. Bethesda: Federation of American Societies for Experimental Biology, 1968, p 347
22. Hartree EF: Determination of protein: A modification of the Lowry method that gives a linear photometric response. *Anal Biochem* 48:422-427, 1972
23. Annan SR, Kim C, Martyn JAJ: Measurement of d-tubocurarine chloride in human urine using solid-phase extraction and reversed-phase high performance liquid chromatography with ultraviolet detection. *J Chromatogr* 526:228-234, 1990
24. Jones R, Vrbova G: Two factors responsible for the development of denervation hypersensitivity. *J Physiol (Lond)* 236:517-538, 1974
25. Katz B, Miledi R: The development of acetylcholine sensitivity in nerve-free segments of skeletal muscle. *J Physiol (Lond)* 170:389-396, 1964
26. Witzemann V, Brenner HR, Sakmann B: Neural factors regulate AChR subunit mRNAs at rat neuromuscular synapses. *J Cell Biol* 114:125-141, 1991
27. Ward JM, Rosen KM, Martyn JAJ: Acetylcholine receptor subunit mRNA changes in burns are different to that seen after denervation. *J Burn Care Rehab* 14:595-601, 1993
28. Eftimie R, Brenner HR, Buonanno A: Myogenin and MyoD join family of skeletal muscle genes regulated by electrical activity. *Proc Nat Acad Sci USA* 88:1349-1353, 1991
29. Witzemann V, Sakmann B: Differential regulation of MyoD and myogenin mRNA levels by nerve-induced muscle activity. *FEBS Lett* 282:259-264, 1991
30. Claudio T, Ross AF, Green WN: Acetylcholine receptor assembly is stimulated by phosphorylation of its  $\gamma$ -subunit. *Neuron* 7:659-666, 1991
31. Ross AF, Green WN, Hartmann DS, Claudio T: Efficiency of acetylcholine receptor subunit assembly and its regulation by cAMP. *J Cell Biol* 113:623-636, 1991
32. Tomera JF, Martyn JAJ: Systemic effects of single hind limb burn injury on skeletal muscle function and cyclic nucleotide levels in the murine model. *Burns Incl Therm Inj* 14:210-219, 1988
33. Tomera JF, Martyn JAJ: Mediators of burn-induced neuromuscular changes in mice. *Br J Pharmacol* 98:921-929, 1989
34. Paton WDM, Ward DR: The margin of safety of neuromuscular transmission. *J Physiol (Lond)* 191:59-90, 1967
35. Ali HH, Savarese JJ: Monitoring of neuromuscular function. *ANESTHESIOLOGY* 45:216-249, 1976
36. Heilbrunn SM, Shah PS, Bristow MR, Valantine HA, Ginsburg R, Fowler MB: Increased  $\beta$ -receptor density and improved hemodynamic response to catecholamine stimulation during long-term metoprolol therapy in heart failure from dilated cardiomyopathy. *Circulation* 79:483-490, 1989
37. Brodde O-E:  $\beta_1$ - and  $\beta_2$ -adrenoceptors in the human heart: Properties, function, and alterations in chronic heart failure. *Pharmacol Rev* 43:203-242, 1991
38. Zochodne DW, Ramsay DA, Shelley S, Saly V, Moffat S: Acute necrotizing myopathy of intensive care: electrophysiological studies. *Muscle Nerve* 17:285-292, 1994
39. Segredo V, Caldwell JE, Matthay MA, Sharma ML, Gruenke LD, Miller RD: Persistent paralysis in critically ill patients after long term infusion of vecuronium. *N Engl J Med* 327:524-528, 1992
40. Sunder N, Martyn JAJ: Muscle relaxants, The Pharmacologic Approach to the Critically Ill Patient. Edited by Chernow B, Braer DC, Holaday JW, Zaloga GP, Zaritsky AL. Baltimore, Williams & Wilkins, 1994, pp 309-320
